# Supplementary material for: Design, synthesis, and optoelectronic properties of benzothiadiazole-fused sulfur and nitrogen-containing polycyclic heteroaromatics
Source: Royal Society of Chemistry journal article supplement (doi:10.1039/d4tc04250f), 2024-11-08
Supplement: d4tc04250f1.pdf [file d4tc04250f1.pdf]

## Supporting Information

### Design, Synthesis, and Optoelectronic Properties of Benzothiadiazole-fused Sulfur and Nitrogen-containing Polycyclic Heteroaromatics

Yuxin Yin,<sup>1#</sup> Rui Shi,<sup>2#</sup> Zhongwei Liu,<sup>1</sup> Yanru Li,<sup>1</sup> Ting Jiang,<sup>2</sup> Lingxu Zhao,<sup>2</sup> Jie Li,<sup>2\*</sup> Deyang Ji,<sup>2</sup> Liqiang Li<sup>2</sup> and Zhuping Fei<sup>1, 3\*</sup>

<sup>1)</sup> *Institute of Molecular Plus, Department of Chemistry, Key Laboratory of Organic Integrated Circuits, Ministry of Education & Tianjin Key Laboratory of Molecular Optoelectronic Science, Tianjin University, Tianjin 300072, China*

<sup>2)</sup> *Key Laboratory of Organic Integrated Circuits, Ministry of Education & Tianjin Key Laboratory of Molecular Optoelectronic Sciences, Department of Chemistry, Institute of Molecular Aggregation Science, Tianjin University, Tianjin 300072, China;*

<sup>3)</sup> *Haihe Laboratory of Sustainable Chemical Transformations, Tianjin 300192, China;*

*#These authors contributed equally.*

## **Contents**

1. Instruments and methods
2. Synthesis
3. Theoretical Calculations
4. Physiochemical characteristics
5. Organic Field-Effect Transistors Characteristics
6. Thin film morphology analysis
7. Organic Phototransistors Characteristics
8. NMR and MS (MALDI-TOF) spectrum
9. Notes and references

## 1. Instruments and methods

### **Organic Field Effect Transistor (OFET) device:**

(1) OFETs device prepared by vacuum deposition (VD): The device structures are all bottom gate top contact (BGTC), i.e. Si/SiO<sub>2</sub>/OSCs/Au or Si/SiO<sub>2</sub>/OTS/OSCs/Au. Si/SiO<sub>2</sub> with a thickness of 300 nm was used for the substrate, and the cleaning process was as follows: the substrate was cleaned by ultrasonic cleaning with deionized water, acetone and isopropanol for two times, and then it was blown dry with nitrogen and put into the oven, and then it was heated by vacuum at 120 °C for 10 min, and then it was cooled down to room temperature. Organic semiconductor layers were deposited on unheated substrates or substrate surfaces at 60 °C, 80 °C, 100 °C, and 140 °C by a vapor deposition rate of 0.04 Å s<sup>-1</sup>, and then 20 nm of gold was vapor-deposited as the source-drain electrodes on the surface of the organic semiconductor layers at a rate of 0.08 Å s<sup>-1</sup>, and the conductive channel lengths and widths were 25 μm and 200 μm, respectively.

(2) Micro-nanocrystalline device prepared by physical vapor transport (PVT): Single crystals of micrometer size were slowly grown in a horizontal tube furnace by slowly introducing high-purity nitrogen, placing a quartz boat with sample powder in the high-temperature zone, and placing an OTS-treated SiO<sub>2</sub>/Si substrate in the relatively low-temperature zone. Micro/nano-sized bottom-gate-top-contact single-crystal devices have been prepared by transferring a gold film onto high-quality single-crystal as a source-drain electrode using "leaf gilding method".

**Nuclear Magnetic Resonance (NMR):** Both <sup>1</sup>H NMR and <sup>13</sup>C NMR tests were performed on JNM-ECZ400R (400 MHz) or JNM-ECZ600R (600 MHz) NMR spectrometer. The solvents were CDCl<sub>3</sub> or 1,1,2,2-C<sub>2</sub>D<sub>2</sub>Cl<sub>4</sub>, and tetramethylsilane (TMS) was used as an internal standard.

**Thermo Gravimetric Analysis (TGA):** Tests were completed by TG 209F3 with nitrogen atmosphere and a ramp rate of 10 °C/min, with test temperatures ranging

from room temperature to 700 °C.

**Differential Scanning Calorimetry (DSC):** It was tested by DSC214 Polyma thermal analyzer in nitrogen atmosphere with a heating or cooling rate of 10 °C/min.

**Density Functional Theory (DFT):** All electronic structure calculation were performed using Gaussian 16<sup>[1]</sup> software package. The geometric structure of investigated molecules was optimized on ground ( $S_0$ ) at B3LYP-D3(BJ)/6-31G\*\* level while no imaginary frequency was found during frequency analysis. The natural transition orbitals (NTOs) and hole-electron distribution analysis were performed by using Multiwfn program<sup>[2]</sup> to investigate corresponding excited states. The NTOs distribution were rendered by using the VMD 1.9.3 program.<sup>[3]</sup> The CT/LE percentage and supplementary parameters were obtained from hole-electron distribution analysis<sup>[4]</sup> for quantitatively evaluating the CT and LE mixing in HLCT states.

**UV-Visible Spectroscopy (UV-Vis):** The solution and film were tested by Shimadzu UV2600 UV spectrometer. The solvent was chloroform and the film samples were prepared from quartz sheets by vacuum evaporation at about 20 nm.

**Photoluminescence (PL):** The solution and film were tested by steady-state fluorescence spectrometer (FLS1000). The solvent was chloroform and the film samples were quartz sheets prepared by vacuum evaporation of about 20 nm.

**Fluorescence Quantum Efficiency (PLQY):** The solution and film fluorescence quantum efficiencies were tested by steady-state fluorescence spectrometer (FLS1000). The solvent was chloroform and the film samples were prepared from quartz wafers by vacuum evaporation at about 20 nm.

**Ultraviolet Photoelectron Spectroscopy (UPS):** The vapor-deposited film samples were measured by an instrument model AXIS ULTRA DLD using an un-

monochromatized UV source of He I. The energy of the He I light source used was 21.22 eV.

**Organic Field Effect Transistor (OFET) Device Performance Testing:** OFETs devices were tested on an Agilent B1500A instrument in a room temperature air environment. The carrier saturation mobility is calculated as:

$$I_{DS} = \left(\frac{W}{2L}\right) C_i \mu (V_G - V_T)^2$$

The surface trap density ( $N_{trap}$ ) of bare Si/SiO<sub>2</sub> or OTS modified Si/SiO<sub>2</sub> is calculated as:

$$N_{trap} = \frac{C_i}{e} \left( \frac{e(SS)}{\ln 10 K_B T} - 1 \right)$$

e: the fundamental unit charge; SS: the subthreshold swing; KB: the Boltzmann constant; T: the temperature.

**Organic Phototransistor (OPT) Device Performance Testing:** Light source instrument model is HSX-UV300 and tested in room temperature air environment. Photosensitivity (P), photoresponsivity (R) and specific detection rate (D\*) were calculated as:

$$P = (I_{light} - I_{dark}) / I_{dark}$$

$$R = (I_{light} - I_{dark}) / (SP_{in})$$

$$D^* = RS^{1/2} (2eI_{dark})^{-1/2}$$

**X-Ray Diffraction (XRD):** Both in-plane and out-of-plane XRD of semiconductor films were tested on MiniFlex600 instrument in a room temperature air environment.

**Atomic Force Microscopy (AFM):** The film microforms, film thickness and surface roughness were determined on Bruker Dimension Icon atomic force microscope in knockdown mode.

## 2. Synthesis

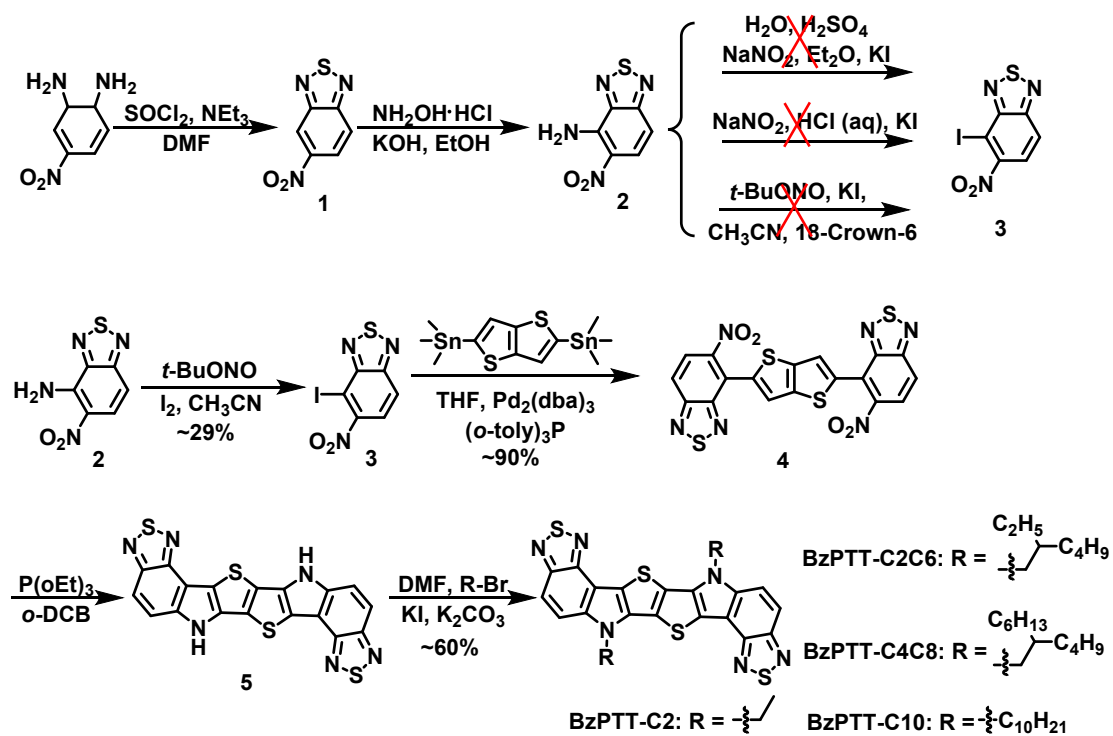

**Scheme S1** The synthetic route to BzPTT-C2, BzPTT-C2C6, BzPTT-C4C8, BzPTT-C10.

### 3. Theoretical Calculations

| Sample                                                                            |       | $S_0-S_1$                                                                         | $S_0-S_2$                                                                         | $S_0-S_3$                                                                          | $S_0-S_4$                                                                           |
|-----------------------------------------------------------------------------------|-------|-----------------------------------------------------------------------------------|-----------------------------------------------------------------------------------|------------------------------------------------------------------------------------|-------------------------------------------------------------------------------------|
| 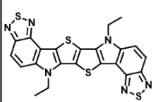 | LUNTO |  |  |  |  |
|                                                                                   | HONTO |  |  |  |  |
|                                                                                   |       | ↑ 99.22%                                                                          | ↑ 99.08%                                                                          | ↑ 98.48%                                                                           | ↑ 97.51%                                                                            |
| Sample                                                                            |       | $S_0-S_5$                                                                         | $S_0-S_6$                                                                         | $S_0-S_7$                                                                          | $S_0-S_8$                                                                           |
|  | LUNTO |  |  |  |  |
|                                                                                   | HONTO |  |  |  |  |
|                                                                                   |       | ↑ 97.76%                                                                          | ↑ 97.08%                                                                          | ↑ 96.85%                                                                           | ↑ 98.15%                                                                            |

**Fig.S1** HONTO and LUNTO orbital jumps of BzPTT-C2, calculated by NTO(TDDFT-B3LYP/6-31G\*\*)

| Sample                                                                              |       | $S_0-S_1$                                                                           | $S_0-S_2$                                                                           | $S_0-S_3$                                                                            | $S_0-S_4$                                                                             |
|-------------------------------------------------------------------------------------|-------|-------------------------------------------------------------------------------------|-------------------------------------------------------------------------------------|--------------------------------------------------------------------------------------|---------------------------------------------------------------------------------------|
| 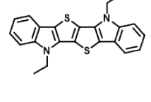 | LUNTO |  |  |  |  |
|                                                                                     | HONTO |  |  |  |  |
|                                                                                     |       | ↑ 99.19%                                                                            | ↑ 96.96%                                                                            | ↑ 95.00%                                                                             | ↑ 99.35%                                                                              |
| Sample                                                                              |       | $S_0-S_5$                                                                           | $S_0-S_6$                                                                           | $S_0-S_7$                                                                            | $S_0-S_8$                                                                             |
|  | LUNTO |  |  |  |  |
|                                                                                     | HONTO |  |  |  |  |
|                                                                                     |       | ↑ 91.91%                                                                            | ↑ 78.93%                                                                            | ↑ 98.85%                                                                             | ↑ 70.35%                                                                              |

**Fig.S2** HONTO and LUNTO orbital jumps of EH-PPTt, calculated by NTO(TDDFT-B3LYP/6-31G\*\*)



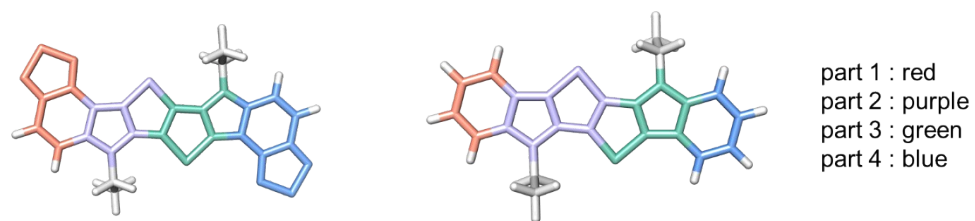

**Fig. S3** The calculated results for  $S_0 \rightarrow S_1$  from hole-electron analysis of BzPTT and EH-PPTt by TD-DFT.

**Table S1** The calculated results for  $S_0 \rightarrow S_1$  from hole-electron analysis of BzPTT and EH-PPTt by TD-DFT.

| Sample  | part | % hole <sup>a</sup> | % electron <sup>b</sup> | % overlap <sup>c</sup> | %CT <sup>d</sup> |
|---------|------|---------------------|-------------------------|------------------------|------------------|
| BzPTT   | 1    | 13.52               | 40.67                   | 23.45                  | 27.15            |
|         | 2    | 43.78               | 10.55                   | 21.49                  | -33.23           |
|         | 3    | 29.05               | 7.36                    | 14.62                  | -21.69           |
|         | 4    | 13.52               | 40.69                   | 23.45                  | 27.18            |
| EH-PPTt | 1    | 12.78               | 18.53                   | 15.39                  | 5.75             |
|         | 2    | 41.64               | 41.73                   | 41.69                  | 0.09             |
|         | 3    | 32.26               | 20.59                   | 25.77                  | -11.66           |
|         | 4    | 12.78               | 18.52                   | 15.39                  | 5.75             |

<sup>a</sup>Contribution percentage of molecule to the hole distribution of hole-electron analysis.

<sup>b</sup>Contribution percentage of molecule to the electron distribution of hole-electron analysis.

<sup>c</sup>Hole-electron overlap percentage of hole-electron analysis.

<sup>d</sup>Contribution percentage of the CT characteristic for  $S_1$  states.

## 4. Physiochemical characteristics

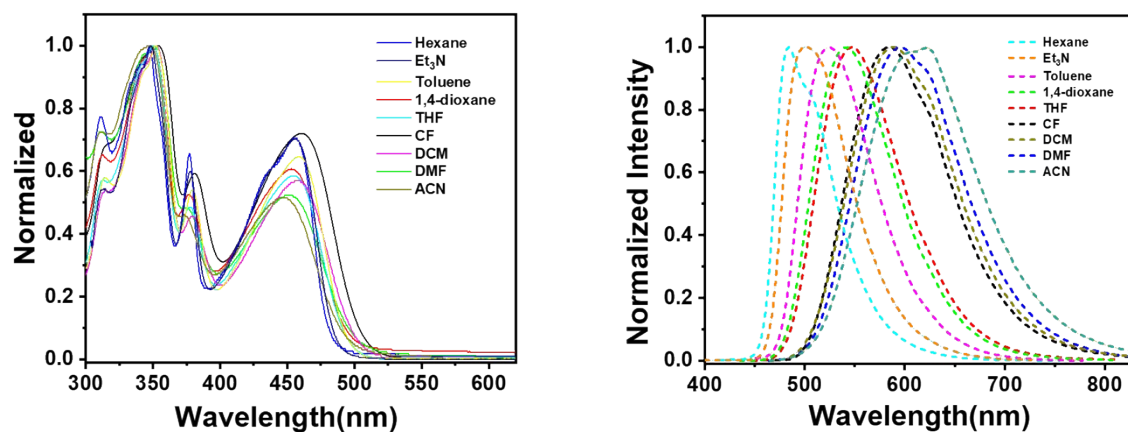

**Fig. S4** UV spectra and solvatochromic effect of BzPTT C2C6 with different polarity; (THF = tetrahydrofuran; CF=chloroform; DMF = N, N-dimethylformamide; ACN= acetonitrile; DCM=dichloromethane). [5]

**Table S2** Absorption and emission peaks of BzPTT-C2C6 in different solvents. [6]

| Solvent           | n     | $\epsilon$ | f( $\epsilon, n$ ) | $\lambda_{\text{abs}}$ (nm) | $\lambda_{\text{em}}$ (nm) | $\Delta\nu(\text{cm}^{-1})$ |
|-------------------|-------|------------|--------------------|-----------------------------|----------------------------|-----------------------------|
| Hexane            | 1.375 | 1.90       | 0.0012             | 457                         | 484                        | 1221                        |
| Toluene           | 1.494 | 2.38       | 0.014              | 458                         | 524                        | 2750                        |
| Et N <sub>3</sub> | 1.401 | 2.42       | 0.048              | 456                         | 500                        | 1930                        |
| 1,4-dioxane       | 1.422 | 4          | 0.131              | 453                         | 541                        | 3591                        |
| CF                | 1.446 | 5.2        | 0.15               | 461                         | 583                        | 4539                        |
| THF               | 1.405 | 7.58       | 0.21               | 457                         | 547                        | 3600                        |
| DCM               | 1.424 | 8.93       | 0.217              | 457                         | 590                        | 4933                        |
| DMF               | 1.430 | 36.7       | 0.275              | 454                         | 596                        | 5248                        |
| ACN               | 1.344 | 37.5       | 0.305              | 447                         | 622                        | 6294                        |

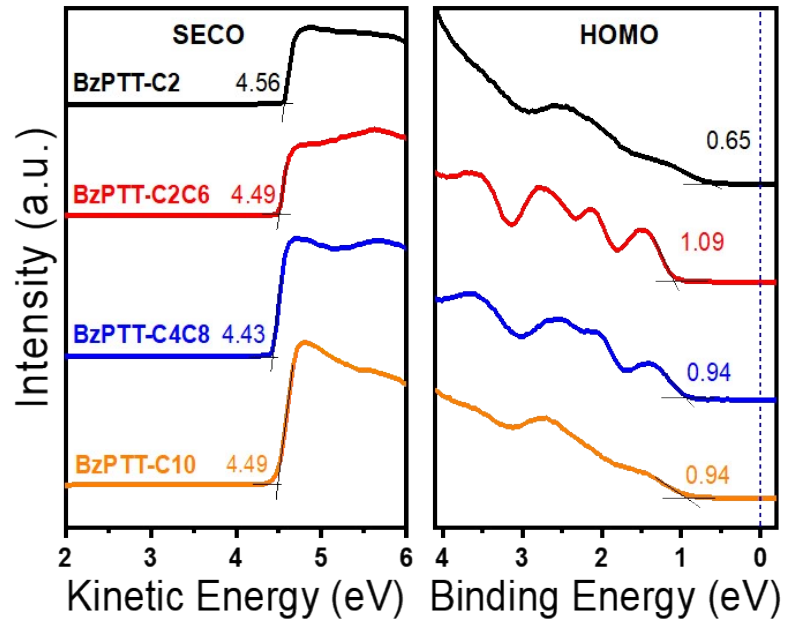

**Fig. S5** UPS spectra of BzPTT-Cn films.

## 5. Organic Field-Effect Transistors Characteristics

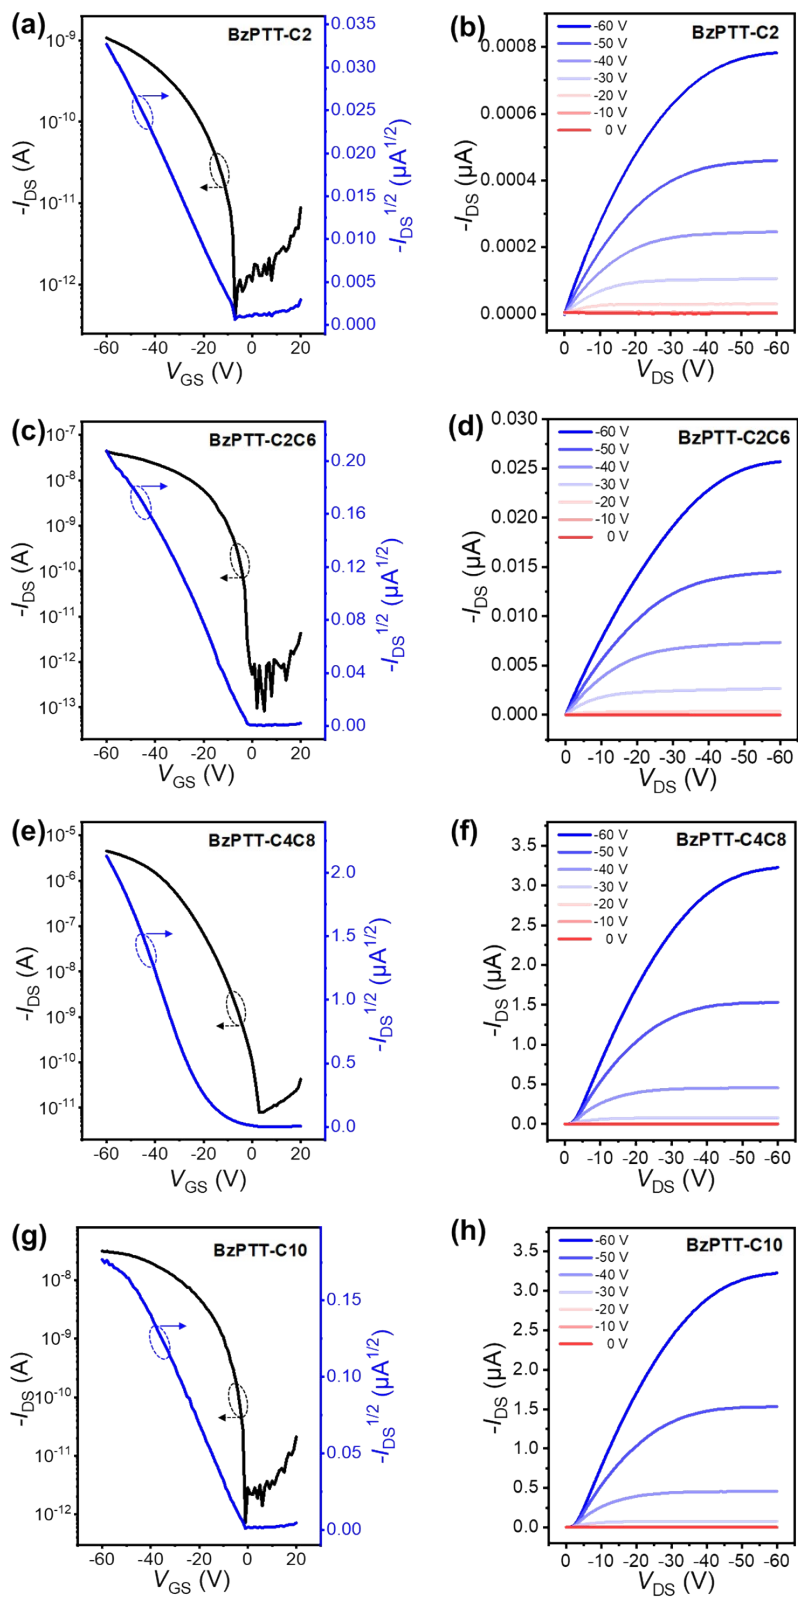

**Fig. S6** The transfer (a, c, e, g) and output (b, d, f, h) curves of OFETs devices based on

BzPTT-Cn by vacuum evaporation with substrate temperature at 60 °C.

**Table S3** OFETs device performance data of BzPTT-Cn with annealing substrates.

| Sample                                 | $\mu_{h, \text{sat}}$<br>[cm <sup>2</sup> V <sup>-1</sup> s <sup>-1</sup> ] | $\mu_{v, \text{sat}} \pm \sigma$<br>[cm <sup>2</sup> V <sup>-1</sup> s <sup>-1</sup> ] | $V_T$ [V]                  | $I_{\text{on}}/I_{\text{off}}$ |
|----------------------------------------|-----------------------------------------------------------------------------|----------------------------------------------------------------------------------------|----------------------------|--------------------------------|
| BzPTT-C2                               | $1.3 \times 10^{-4}$ <sup>a</sup> ,                                         | $1.13 \times 10^{-4} \pm 1.22 \times 10^{-5}$ <sup>a</sup> ,                           | -0.3—0.3 <sup>a</sup> ,    | $10^4$ <sup>a</sup> ,          |
|                                        | $3.4 \times 10^{-5}$ <sup>b</sup>                                           | $2.45 \times 10^{-5} \pm 5.90 \times 10^{-6}$ <sup>b</sup>                             | -7.9—-6.1 <sup>b</sup>     | $10^3$ <sup>b</sup>            |
| BzPTT-C2C6                             | $6.0 \times 10^{-4}$ <sup>a</sup> ,                                         | $5.51 \times 10^{-4} \pm 6.95 \times 10^{-5}$ <sup>a</sup> ,                           | -11.1—-9.3 <sup>a</sup> ,  | $10^5$ <sup>a</sup> ,          |
|                                        | $9.3 \times 10^{-4}$ <sup>b</sup>                                           | $6.97 \times 10^{-4} \pm 2.06 \times 10^{-4}$ <sup>b</sup>                             | -9.7—-5.7 <sup>b</sup>     | $10^4$ — $10^5$ <sup>b</sup>   |
| BzPTT-C4C8                             | 0.12 <sup>a</sup> ,                                                         | $0.093 \pm 0.012$ <sup>a</sup> ,                                                       | -20.6—-15.4 <sup>a</sup> , | $10^7$ <sup>a</sup> ,          |
|                                        | 0.096 <sup>b</sup>                                                          | $0.088 \pm 0.012$ <sup>b</sup>                                                         | -19.4—-17.3 <sup>b</sup>   | $10^7$ <sup>b</sup>            |
| BzPTT-C10                              | $1.6 \times 10^{-3}$ <sup>a</sup> ,                                         | $1.35 \times 10^{-3} \pm 1.52 \times 10^{-4}$ <sup>a</sup> ,                           | -7.8—-6.2 <sup>a</sup> ,   | $10^5$ <sup>a</sup> ,          |
|                                        | $4.8 \times 10^{-4}$ <sup>b</sup>                                           | $4.20 \times 10^{-4} \pm 3.51 \times 10^{-5}$ <sup>b</sup>                             | -3.9—-3.5 <sup>b</sup>     | $10^4$ — $10^5$ <sup>b</sup>   |
| Micro-nanocrystalline<br>of BzPTT-C4C8 | 0.24                                                                        | $0.19 \pm 0.03$                                                                        | -11.7—-6.4                 | $10^6$                         |

<sup>a</sup>. Substrate temperature of 25 °C ; <sup>b</sup>. Substrate temperature of 60 °C.

## 6. Thin film morphology analysis

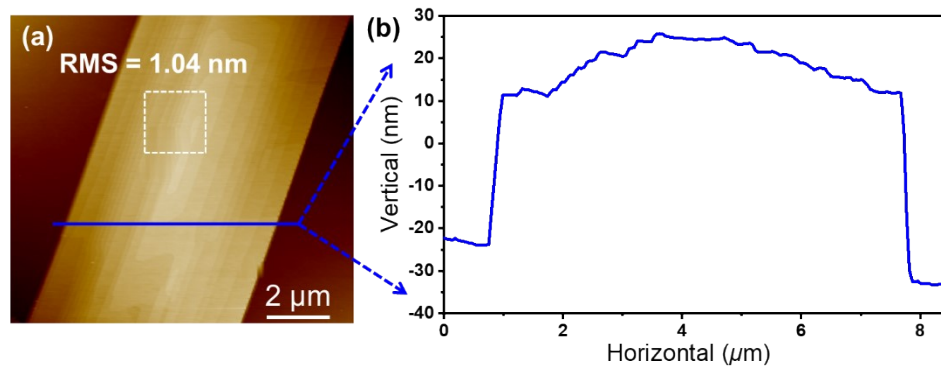

**Fig. S7** AFM image (a) of BzPTT-C4C8 micro-nanocrystals prepared by PVT and heights (b) along the blue line in the image (a).

## 7. Organic Phototransistors Characteristics

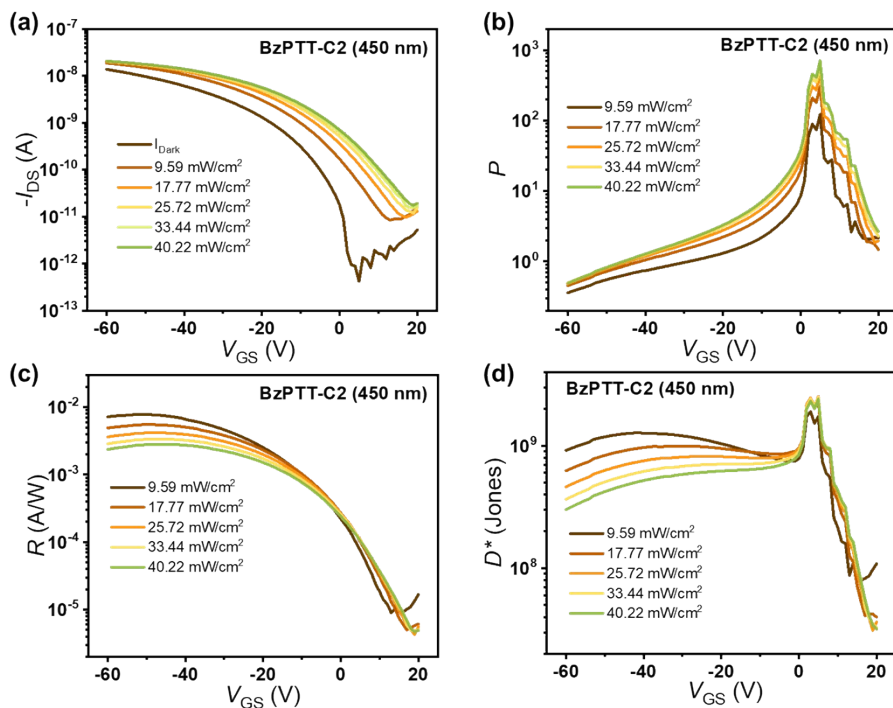

**Fig. S8** Transfer (a), P (b), R (c) and  $D^*$  (d) curves of BzPTT-C2-based phototransistor measured under different illumination intensities.

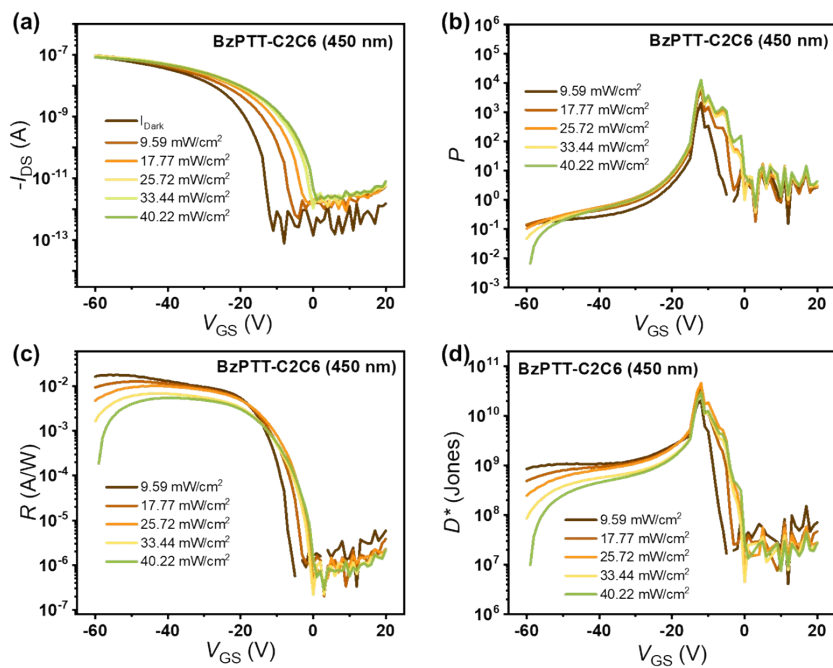

**Fig. S9** Transfer (a), P (b), R (c) and  $D^*$  (d) curves of BzPTT-C2C6-based phototransistor measured under different illumination intensities.

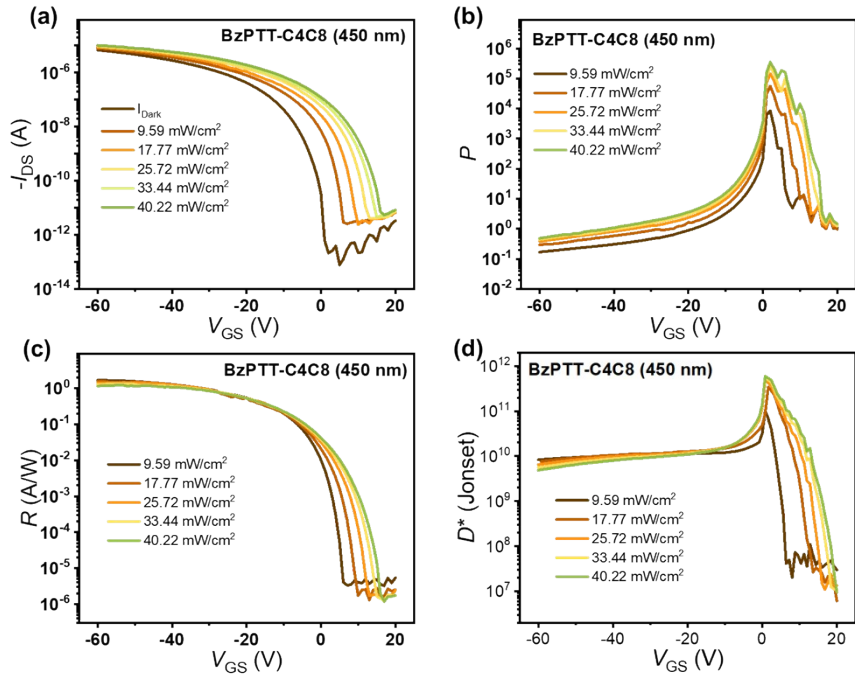

**Fig. S10** Transfer (a), P (b), R (c) and  $D^*$  (d) curves of BzPTT-C4C8-based phototransistor measured under different illumination intensities.

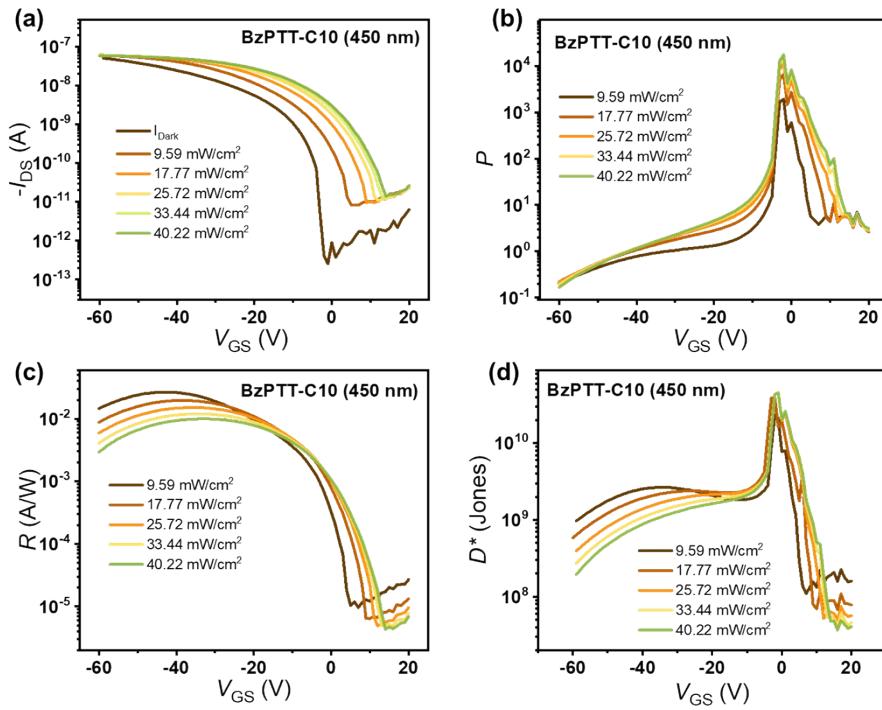

**Fig. S11** Transfer (a), P (b), R (c) and  $D^*$  (d) curves of BzPTT-C10-based phototransistor measured under different illumination intensities.



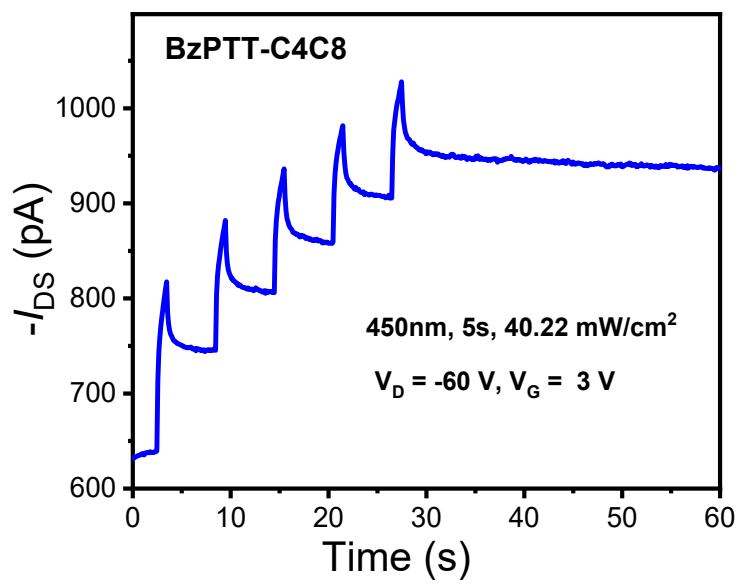

**Fig. S12** Photo-switching characteristics of BzPTT-C4C8.

## 8. NMR and MS (MALDI-TOF) spectrum

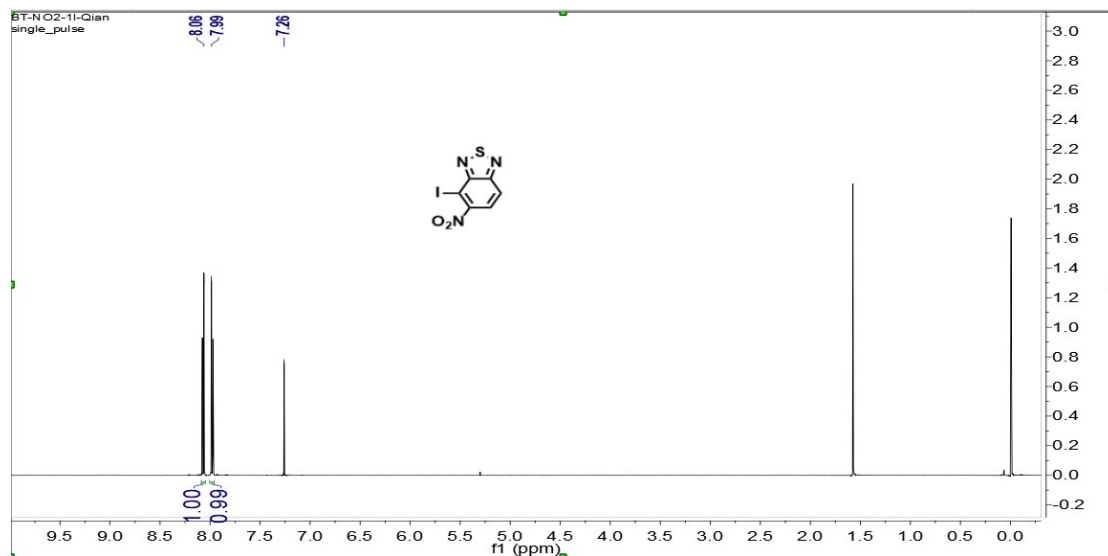

Fig. S13  $^1\text{H}$  NMR spectrum of compound 3 in  $\text{CDCl}_3$  (600 MHz).

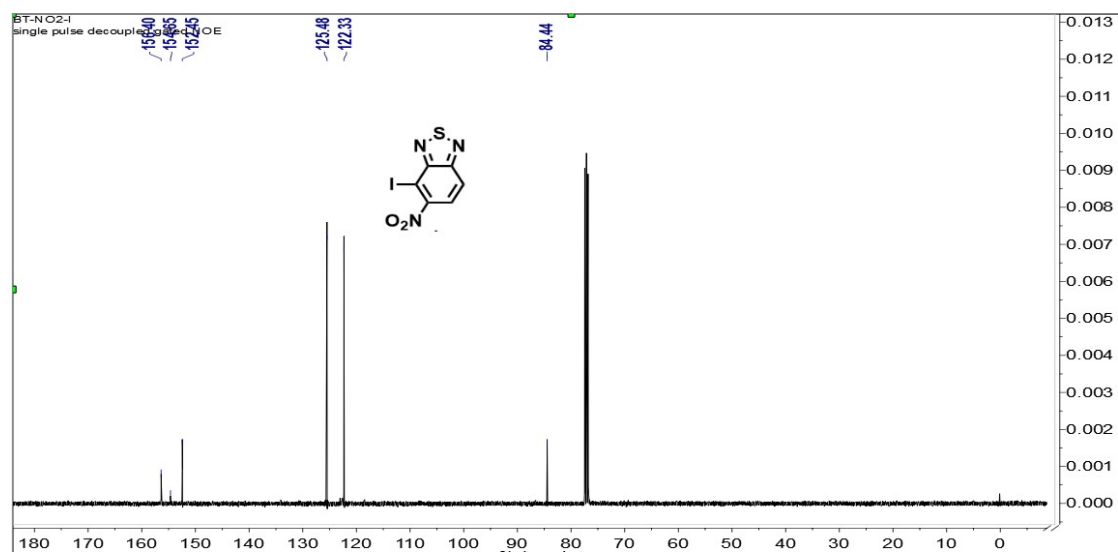

Fig. S14  $^{13}\text{C}$  NMR spectrum of compound 3 in  $\text{CDCl}_3$  (600 MHz).

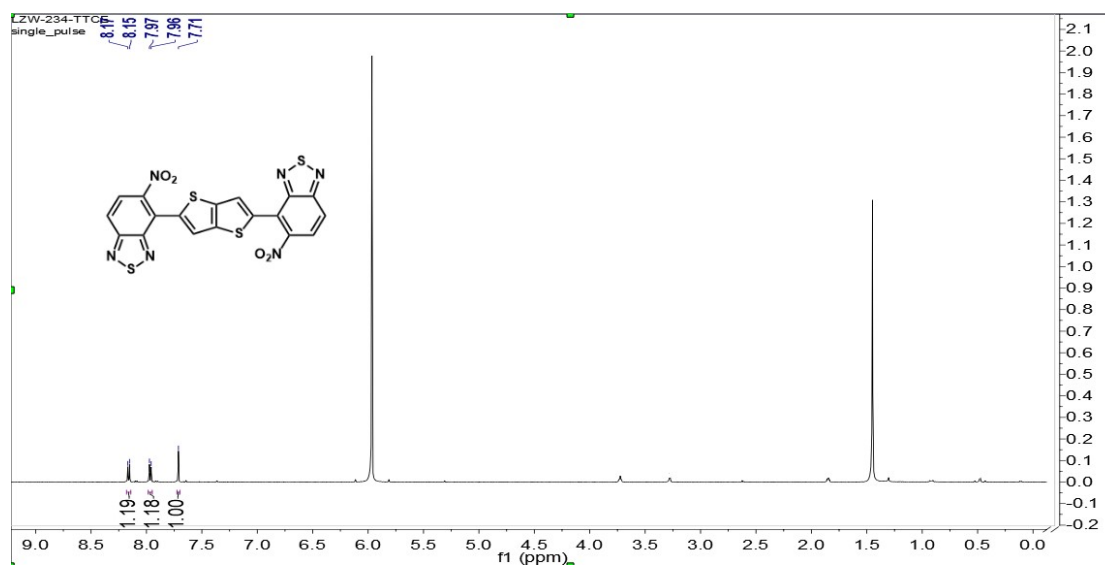

**Fig. S15**  $^1\text{H}$  NMR spectrum of compound 4 in 1,1,2,2- $\text{C}_2\text{D}_2\text{Cl}_4$  (100°C, 600 MHz).

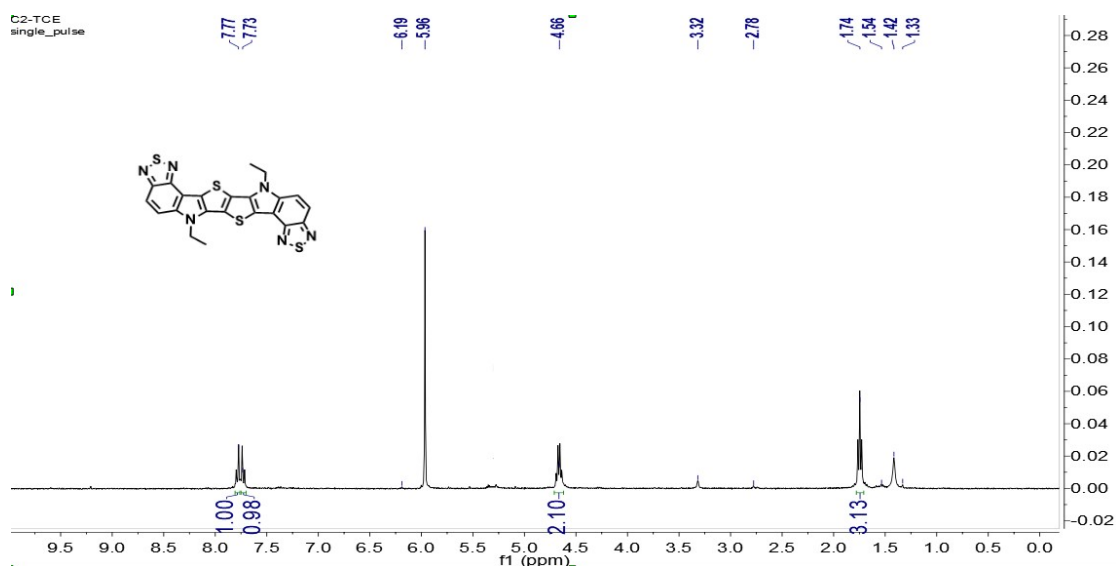

**Fig. S16**  $^1\text{H}$  NMR spectrum of compound BzPTT-C2 in 1,1,2,2- $\text{C}_2\text{D}_2\text{Cl}_4$  (130°C, 400 MHz).

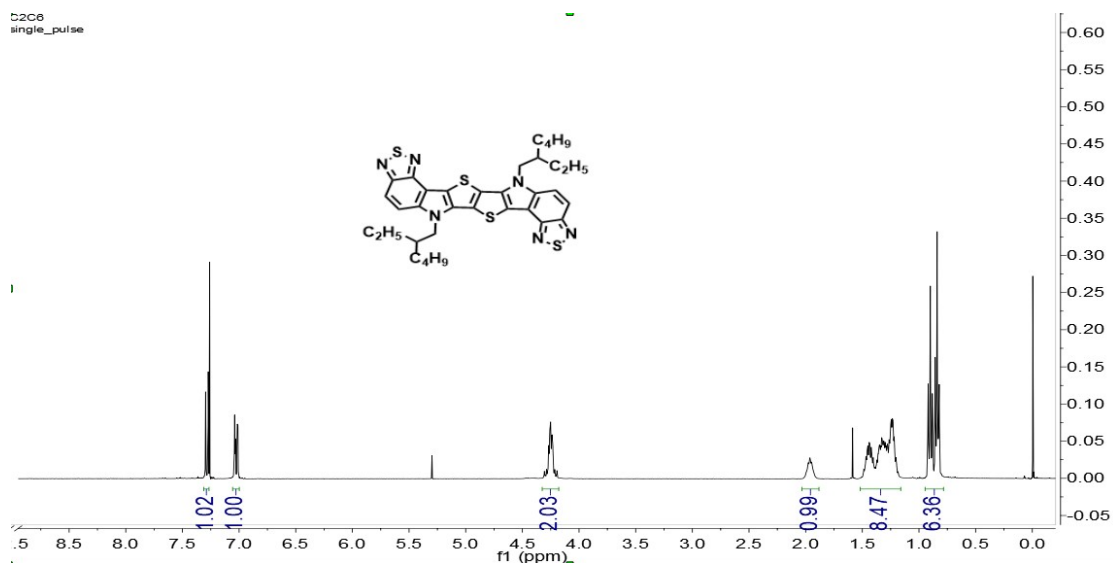

**Fig. S17**  $^1\text{H}$  NMR spectrum of compound BzPTT-C2C6 in  $\text{CDCl}_3$  (400 MHz).

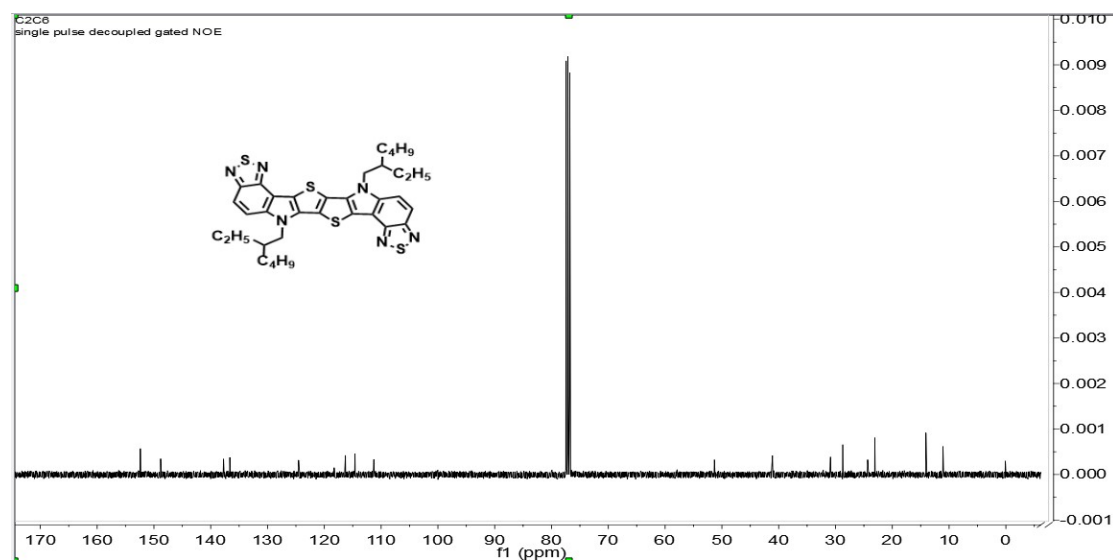

**Fig. S18**  $^{13}\text{C}$  NMR spectrum of compound BzPTT-C2C6 in  $\text{CDCl}_3$  (150 MHz).

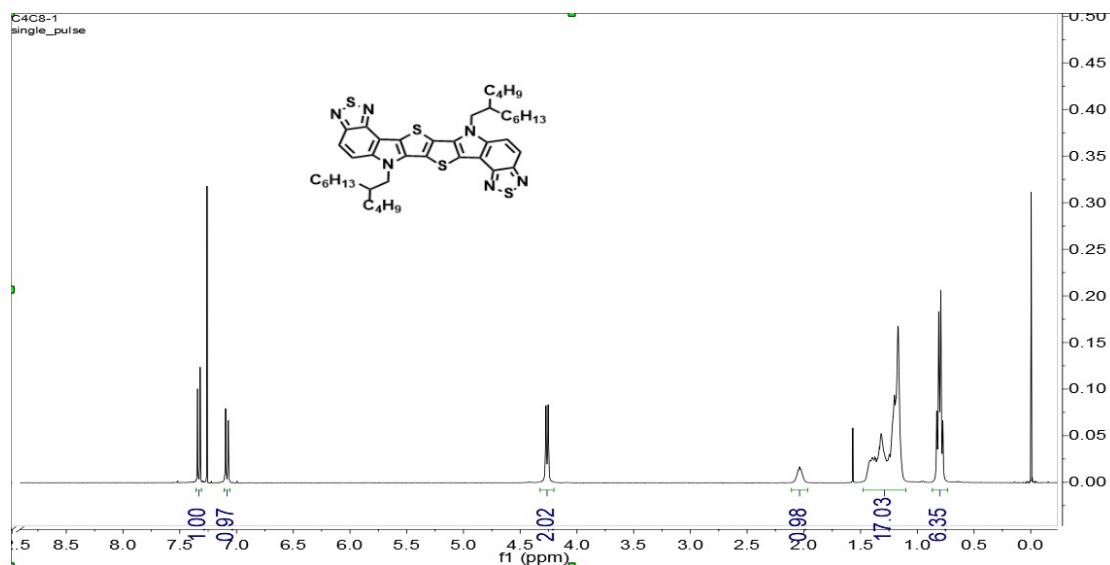

**Fig. S19**  $^1\text{H}$  NMR spectrum of compound BzPTT-C4C8 in  $\text{CDCl}_3$  (400 MHz).

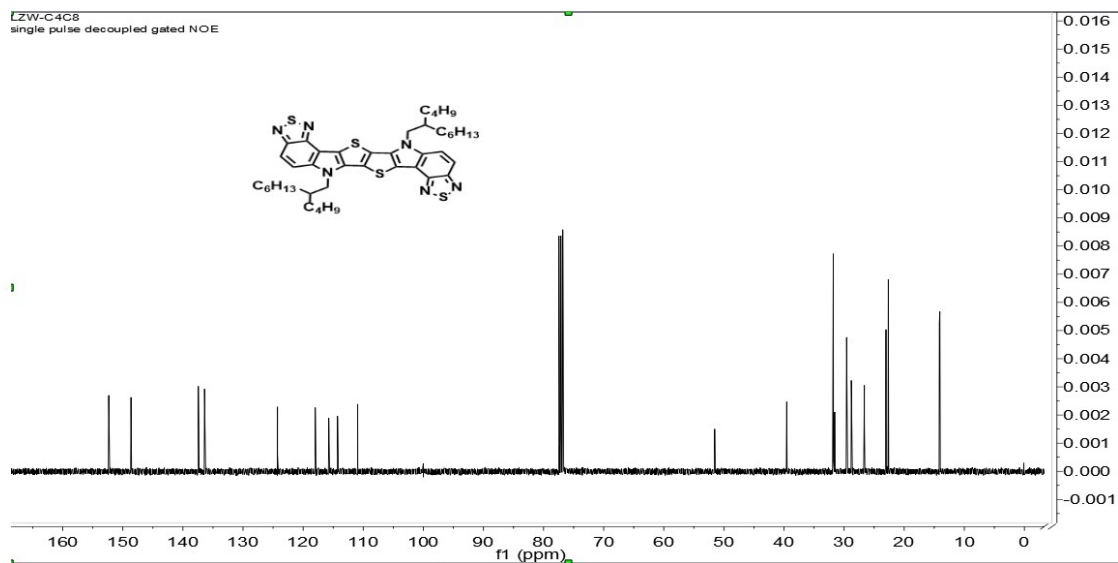

**Fig. S20**  $^{13}\text{C}$  NMR spectrum of compound BzPTT-C4C8 in  $\text{CDCl}_3$  (150 MHz).

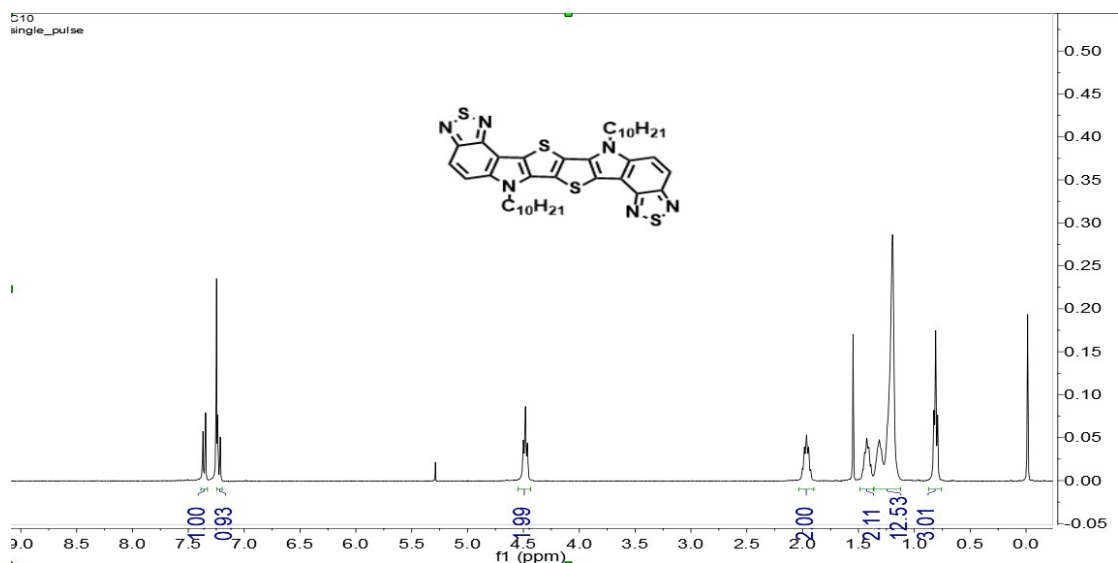

Fig. S21 <sup>1</sup>H NMR spectrum of compound BzPTT-C10 in CDCl<sub>3</sub> (400 MHz).

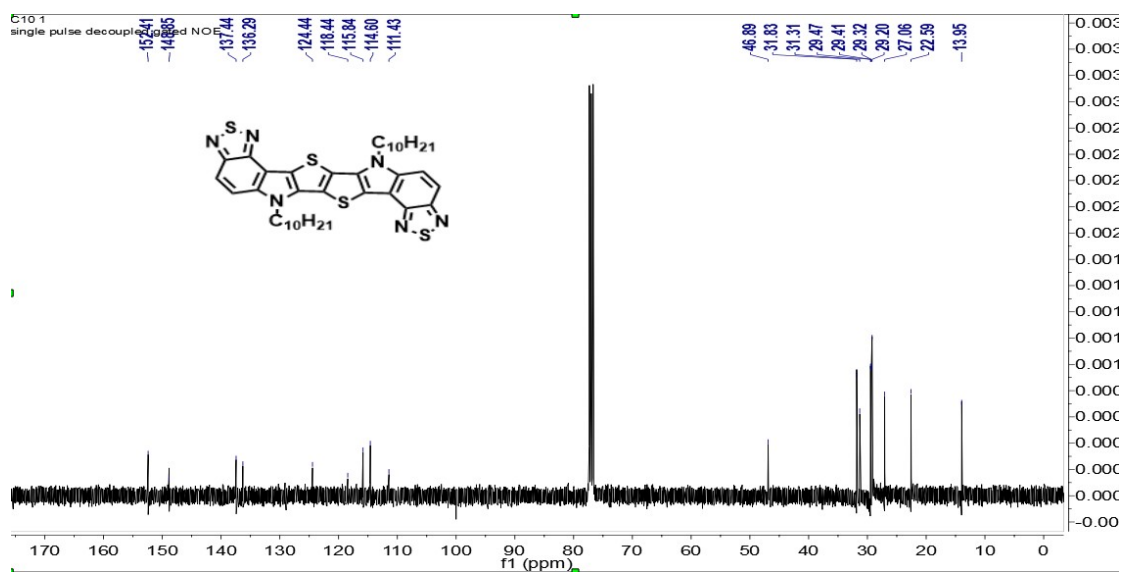

Fig. S22 <sup>13</sup>C NMR spectrum of compound BzPTT-C10 in CDCl<sub>3</sub> (150 MHz).

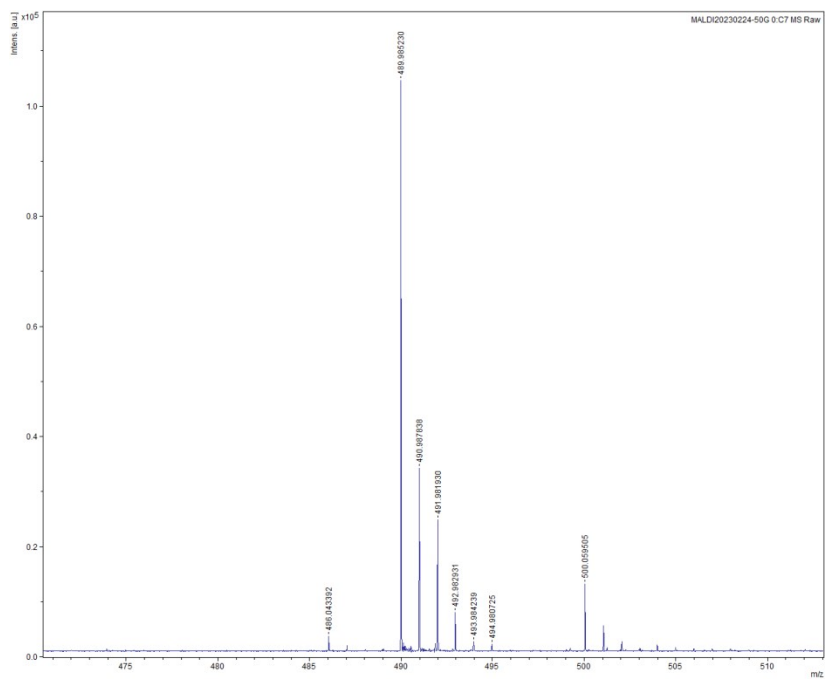

Fig. S23 MS (MALDI-TOF) spectrum of BzPTT-C2.

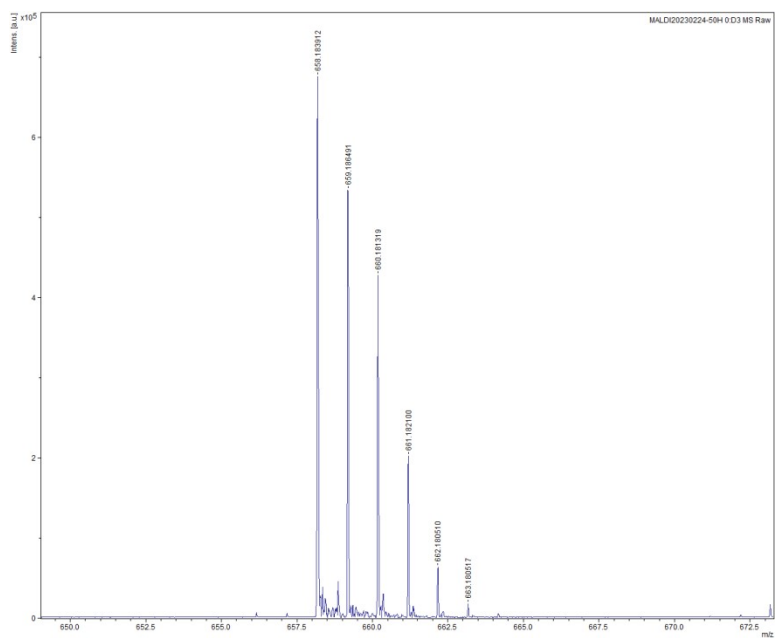

Fig. S24 MS (MALDI-TOF) spectrum of BzPTT-C2C6.

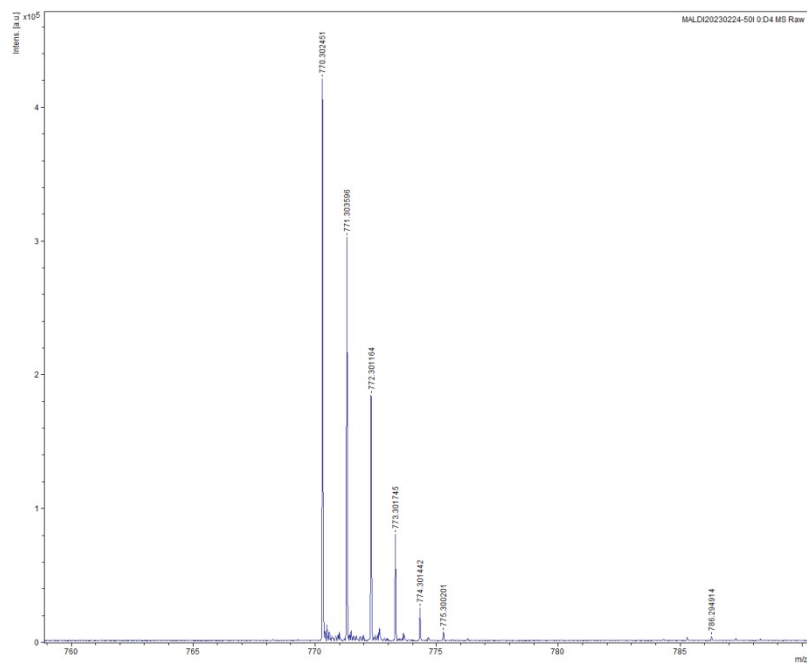

**Fig. S25** MS (MALDI-TOF) spectrum of BzPTT-C4C8.

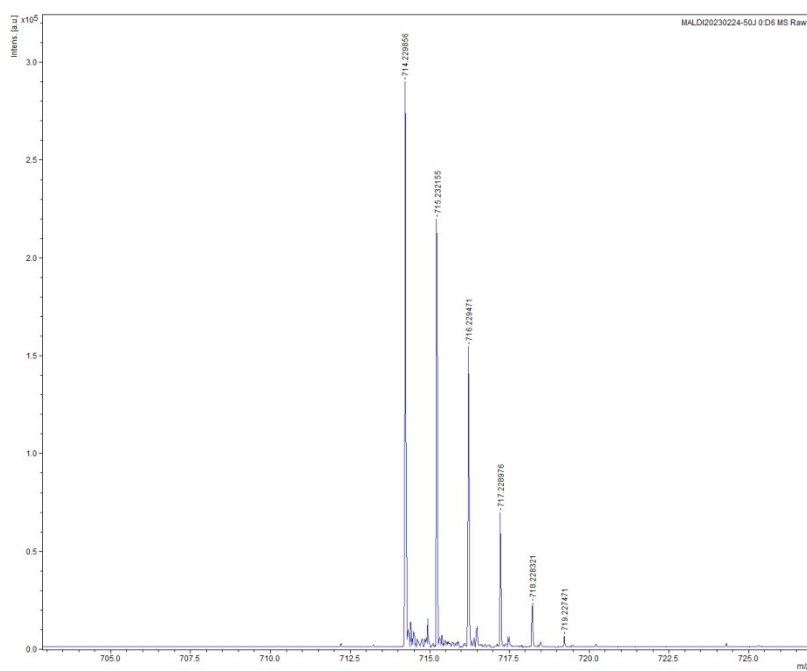

**Fig. S26** MS (MALDI-TOF) spectrum of BzPTT-C10.



## 9. Notes and references

- 1 Frisch, M. J.; Trucks, G. W.; Schlegel, H. B.; Scuseria, G. E.; Robb, M. A.; Cheeseman, J. R.; Scalmani, G.; Barone, V.; Petersson, G. A.; Nakatsuji, H.; et al. Gaussian 16 Rev. A.03; *Gaussian, Inc.: Wallingford CT*, 2016.
- 2 LU, Tian and CHEN, Feiwu. *J. Comput. Chem.* 2012, **33**, 580–592.
- 3 Humphrey, W.; Dalke, A. and Schulten, K. *J. Mol. Graph.* 1996, **14**, 33–38.
- 4 Liu, Z., Lu, T. and Chen, Q. *Carbon*, 2020, **165**, 461-467.
- 5 Zhu, J., Wang, T., An, D., Zhang, R., Gu, Y., Zhou, G. and Liu, Y. *J. Am. Chem. Soc.* 2024, **146**, 21922–21931.
- 6 Li, W., Pan, Y., \*\*ao, R., Peng, Q., Zhang, S., Ma, D. and Ma, Y. *Adv. Funct. Mater.* ,2014, **24**, 1609-1614.
